# Supplementary material for: Construction, analysis and validation of co-expression network to understand stress adaptation in Deinococcus radiodurans R1
Source: PLoS One. 2020 Jun 24;15(6):e0234721. doi: 10.1371/journal.pone.0234721 (PMC7314050; doi:10.1371/journal.pone.0234721)
Supplement: S1 Table — (XLS) [file pone.0234721.s009.xls]

## Sheet: Sheet1
S1 Table . Detailed list of microarray experiments
Sr.No.	GEO Accesion Number	Microarray experiment Details
		Microarray samples	Name of experiment
1	GSE59135	1	R1 vs. bphPR deletion
2	GSE59138	1	Control treated with MMC (5 µg/ml) vs. bphPR deletion mutant treated with MMC (5 µg/ml)
3	GSE18661	2	Deinococcus radiodurans R1: rpob 9-bp-deletion vs. wild-type
4	GSE33758	3	Deinococcus radiodurans R1: wild type strains vs. DR0199-deletion strains
5	GSE17720	2	Microarray studies of drb0090 mutant vs wild type
6	GSE17722	2	Microarray studies of dr2518 knockout mutant vs wild type
7	GSE17724	2	Microarray studies of pqqE disruption mutant vs wild type
8	GSE20383	32	Transcriptional profiling of Deinococcus radiodurans comparing wild type cells with cadmium treated cells at four time points
9	GSE29516	16	0.3M NaCl vs Control and 2M NaCl vs Control
