# Supplementary material for: Construction, analysis and validation of co-expression network to understand stress adaptation in Deinococcus radiodurans R1
Source: PLoS One. 2020 Jun 24;15(6):e0234721. doi: 10.1371/journal.pone.0234721 (PMC7314050; doi:10.1371/journal.pone.0234721)
Supplement: S2 Table — (XLS) [file pone.0234721.s010.xls]

## Sheet: Sheet1
S2 Table . List of oligo-nucleotides used for qRT-PCR
Sr.No.	Genes	Forward primer (5’-3’)	Reverse primer (5’-3’)
1	16S	TGGAGCATGTGGTTTAATTCGA	TCCGGGACTTAACCCAACA
2	DR_0997	AAGGTGGTCGGTGAACT	GGCAAAGTGCTGAGCTTTA
3	DR_2287	ATCGTTGCCATCGTCAAG	CAGCACTTCCTCGTTGTAG
5	DR_A0071	GCGACAACCTTCCTCAA	CGGAGTTGATGGCTCAC
12	DR_A0006	AACGACGAAGGCGAAAC	CTTGTCGTCGAGCACTTC
15	DR_2494	CCTGACCGACAGCAAGTA	CTGGGTGACCAGGTTGT
16	DR_0408	CATCCTGCTCGACATCAAC	GACTCGTGGTGAGCATAAAG
17	DR_1185	AACACCACCGTGACTTTC	GTCTTGAACGAGGTGATCTG
18	DR_0972	ACGGTGAAGTCTTTGTCCAC	CTGCTTATAGCTGCCGAAGG
19	DR_1816	GCGCTCTCGTCTTTCTTCTAAC	CGGTACGACCCACCATAAGA
20	DR_2160	CAGAGCGATTCCGAGATTT	CGGGAATGCCGAACAAA
21	DR_2547	GCTGCTCGATCACCTCTA	GTTTGACCTGTCCCTGAATC
22	DR_2285	CAAATGGGTGCAGGAACA	ACTTGGGCACGCAAATG
